# Supplementary material for: Macrophage-targeted nanoparticles mediate synergistic photodynamic therapy and immunotherapy of tuberculosis
Source: Royal Society of Chemistry journal article supplement (doi:10.1039/d2ra06334d), 2023-01-01
Supplement: d2ra06334d1.pdf [file d2ra06334d1.pdf]

**Supplementary Information**

**Macrophage-targeted Nanoparticles Mediate Synergistic Photodynamic**

**Therapy and Immunotherapy of Tuberculosis.**

Na Tian,<sup>a,b</sup> Huijuan Duan,<sup>a,b</sup> Tingming Cao,<sup>a,b</sup> Guangming Dai,<sup>a,b</sup> Gang Sheng,<sup>a,b</sup> Hongqian Chu<sup>\*a,b</sup> and Zhaogang Sun<sup>\*a,b</sup>

<sup>a</sup> Beijing Chest Hospital, Capital Medical University, Beijing 101149, China.

<sup>b</sup> Beijing Key Laboratory on Drug-Resistant Tuberculosis Research, Beijing Tuberculosis and Thoracic Tumor Institute, Beijing 101149, China

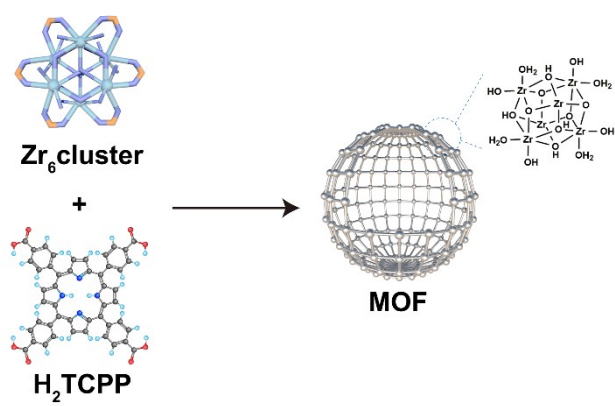

**Figure S1:** The illustration of PCN 224 3D framework structure.

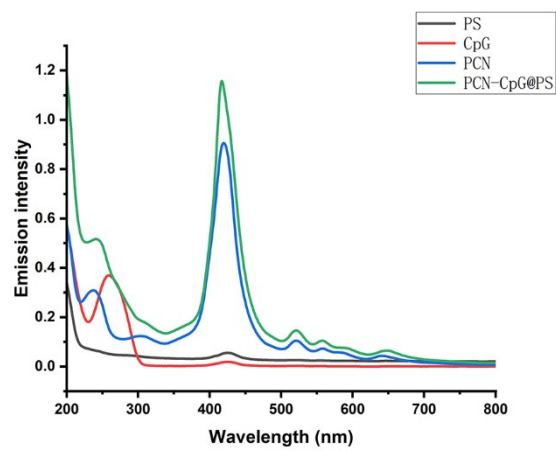

**Figure S2:** UV-vis spectra of PS, CpG 2395, PCN and PCN-CpG@PS in aqueous solution.

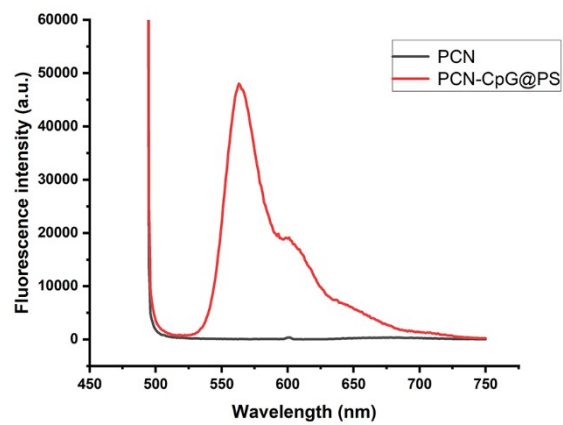

**Figure S3:** Fluorescence emission spectra of PCN and PCN-CpG@PS in aqueous solution.

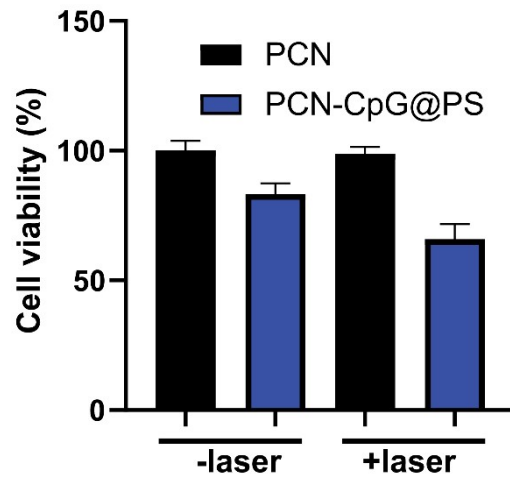

**Figure S4:** Cytotoxicity of 10  $\mu\text{g}/\text{mL}$  of PCN-CpG@PS under dark conditions and irradiated with 640 nm light.

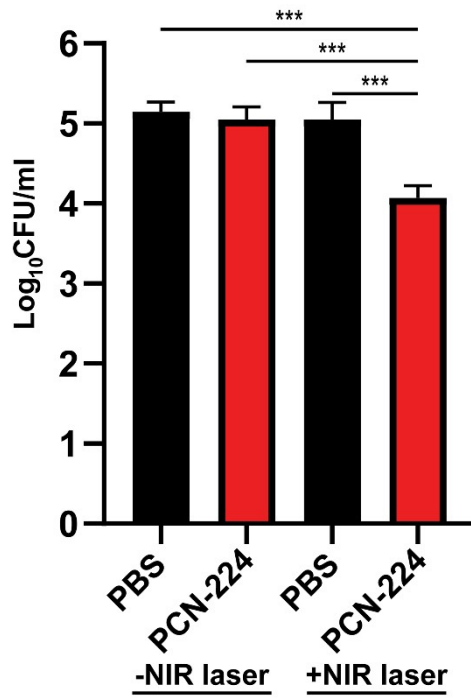

**Figure S5:** The number of Mtb in RAW264.7 cells after different treatments with/without laser irradiation. N=3. Bar: mean; error bar: standard deviation. \*\*\* $P_{1\text{-way ANOVA}} < 0.001$ .

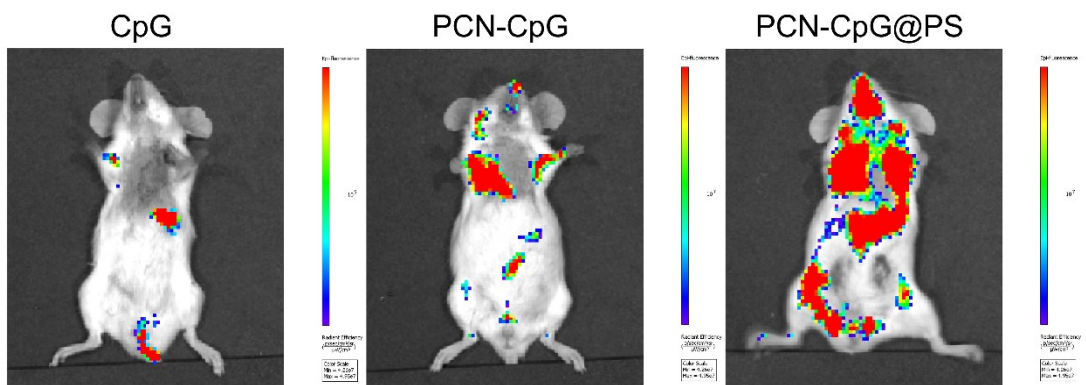

**Figure S6:** Fluorescence images of BALB/c mice at 6 h after tail vein injection of CpG, PCN-CpG and PCN-CpG@PS, respectively.

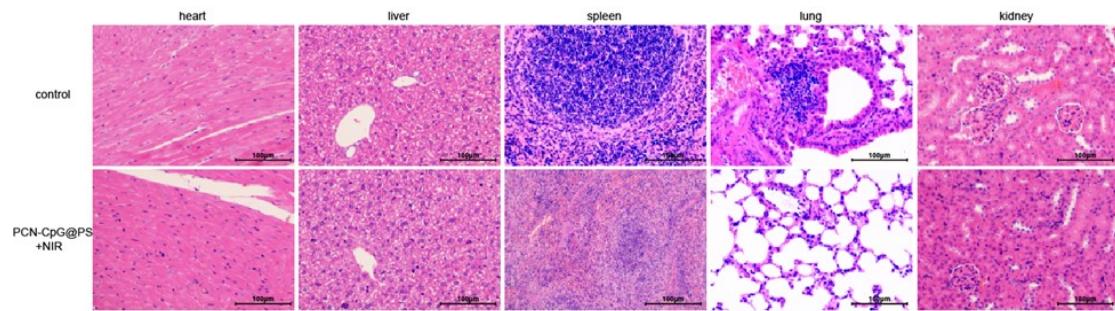

**Figure S7:** HE staining of the heart, liver, spleen, lung and kidney in mice of untreated and PCN-CpG@PS group. Scale bar = 100 μm.



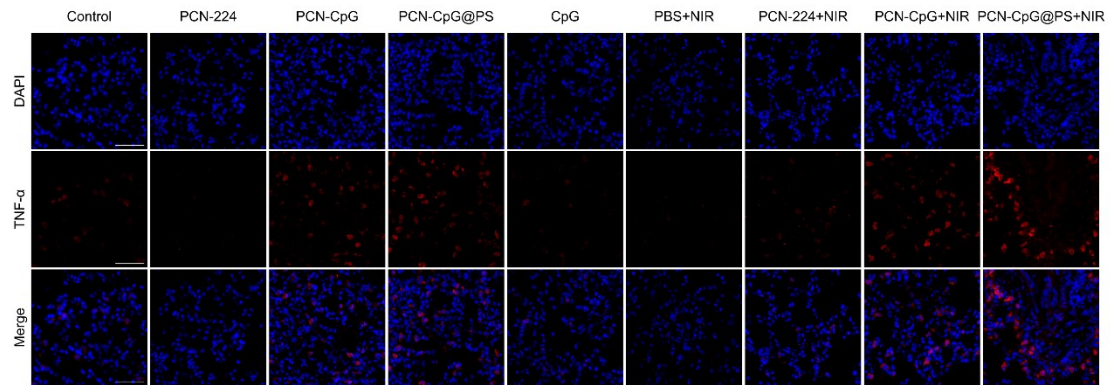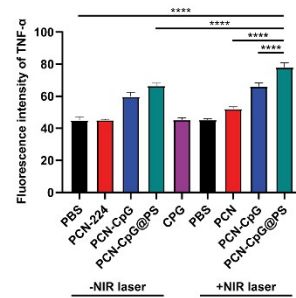

**Figure S8:** Immunofluorescence Staining of left lungs of differently treated BALB/c mice under laser irradiation. Composite image of TNF- $\alpha$  staining and intensity value of lung sections of differently treated BALB/c mice. Nuclei are visualized with Hoechst. Scale bar = 50  $\mu$ m. N=3. Bar: mean; error bar: standard deviation. \*\*\*\* $P_{1\text{-way ANOVA}} < 0.0001$ .

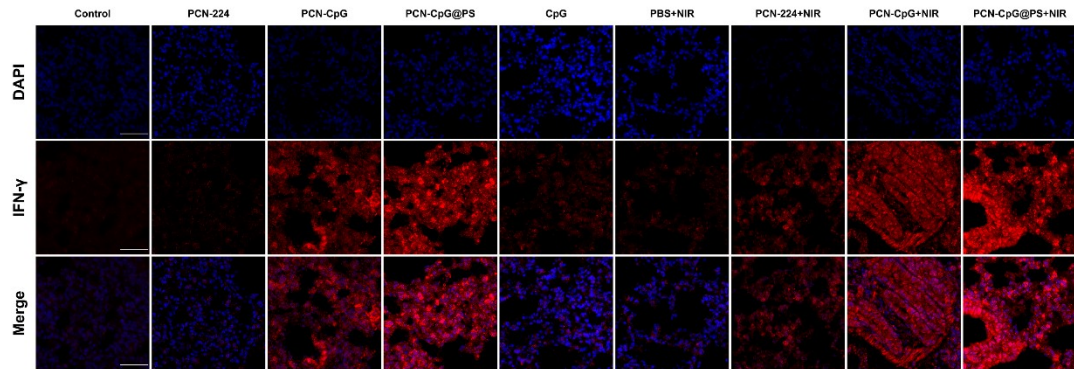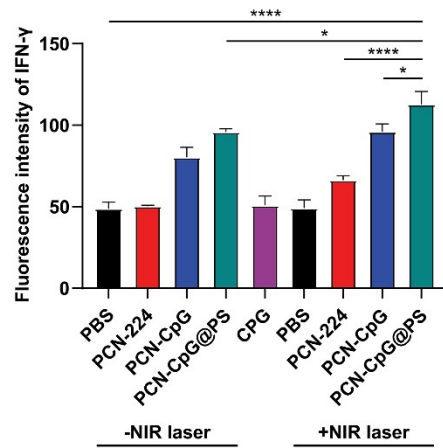

**Figure S9:** Immunofluorescence Staining of left lungs of differently treated BALB/c mice under laser irradiation. Composite image of IFN- $\gamma$  staining and intensity value of lung sections of differently treated BALB/c mice. Nuclei are visualized with Hoechst. Scale bar = 50  $\mu$ m. N=3. Bar: mean; error bar: standard deviation. \* $P_{1\text{-way ANOVA}} < 0.05$ , \*\*\*\* $P_{1\text{-way ANOVA}} < 0.0001$ .
